# Supplementary material
Source: publisher figshare collection journal article supplement (https://tandf.figshare.com/articles/dataset/_/988732)
Supplement: Supplementary file 1 [file 4]

# Supporting Information:

## A selective supramolecular photochemical sensor for dopamine

Setu Kasera, Zarah Walsh, Jesús del Barrio, and Oren A. Scherman\*

*Melville Laboratory for Polymer Synthesis, Department of Chemistry, University of Cambridge, Lensfield Road, Cambridge CB2 1EW, UK. Email: oas23@cam.ac.uk*

**Table S1:** Association constants of PDI-CB[8] towards catecholamines and their mixtures in the presence and absence of ascorbic acid

| Second guest              | $K_a$ ( $M^{-1}$ ) without Asc | $R^2$ | $K_a$ ( $M^{-1}$ ) with Asc  | $R^2$ |
|---------------------------|--------------------------------|-------|------------------------------|-------|
| Dopamine                  | $(1.0 \pm 0.009) \cdot 10^6$   | 0.99  | $(1.0 \pm 0.013) \cdot 10^6$ | 0.98  |
| Epinephrine               | $(1.0 \pm 0.007) \cdot 10^3$   | 0.99  | $(1.3 \pm 0.008) \cdot 10^3$ | 0.99  |
| Norepinephrine            | $(2.9 \pm 0.099) \cdot 10^2$   | 0.51  | $(5.3 \pm 0.087) \cdot 10^2$ | -0.45 |
| Mixture 1 (EPI + NE)      | $(1.4 \pm 0.003) \cdot 10^3$   | 0.98  | $(1.5 \pm 0.005) \cdot 10^3$ | 0.98  |
| Mixture 2 (EPI + NE + DA) | $(0.9 \pm 0.006) \cdot 10^6$   | 0.99  | $(1.0 \pm 0.014) \cdot 10^6$ | 0.99  |

$\pm$  error values denote standard deviation;

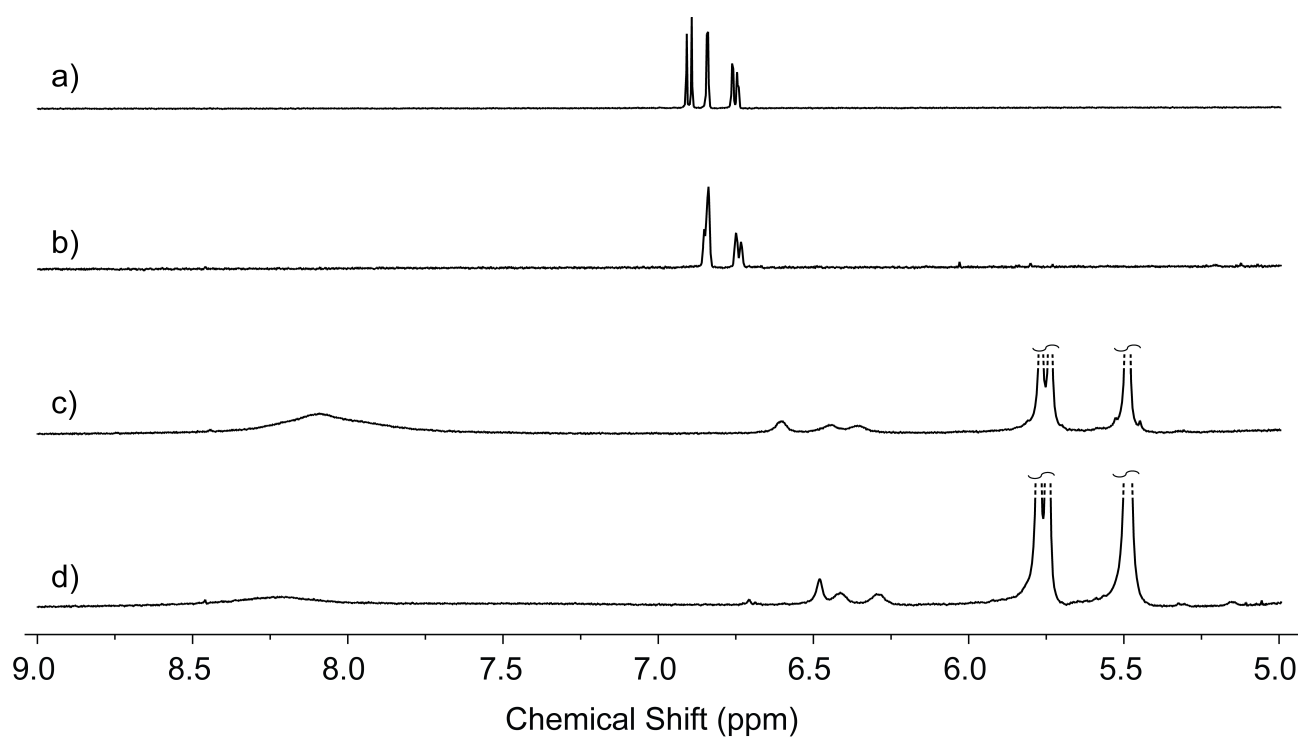

**Figure S1:** Partial <sup>1</sup>H NMR spectra (500 MHz, D<sub>2</sub>O, 298 K) of a) DA, b) EPI, c) DA·PDI·CB[8] and d) EPI·PDI·CB[8].

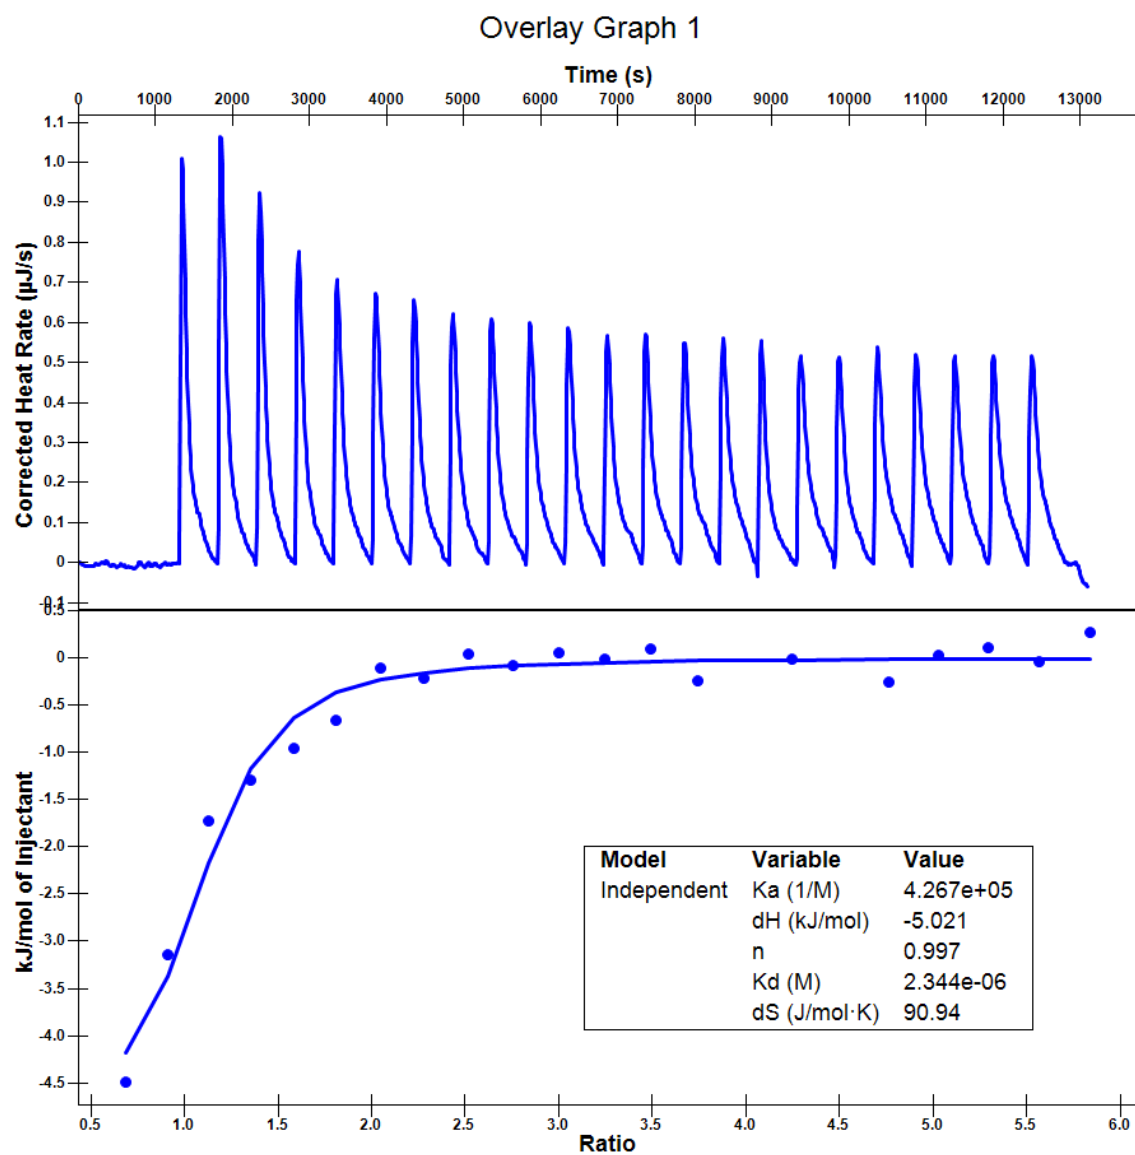

**Figure S2:** Isothermal Titration Calorimetry measurements of DA and PDI-CB[8].

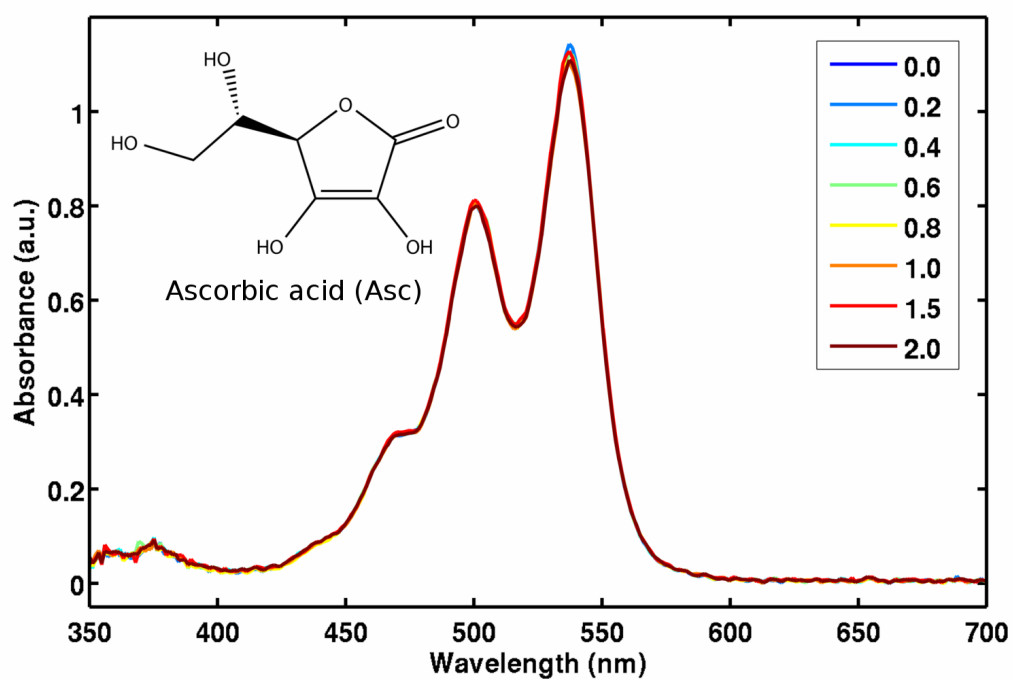

**Figure S3:** Titration of ascorbic acid into 1:1 PDI·CB[8] ( $3 \times 10^{-5}$  M) solution does not show any marked change in the absorbance bands of PDI.

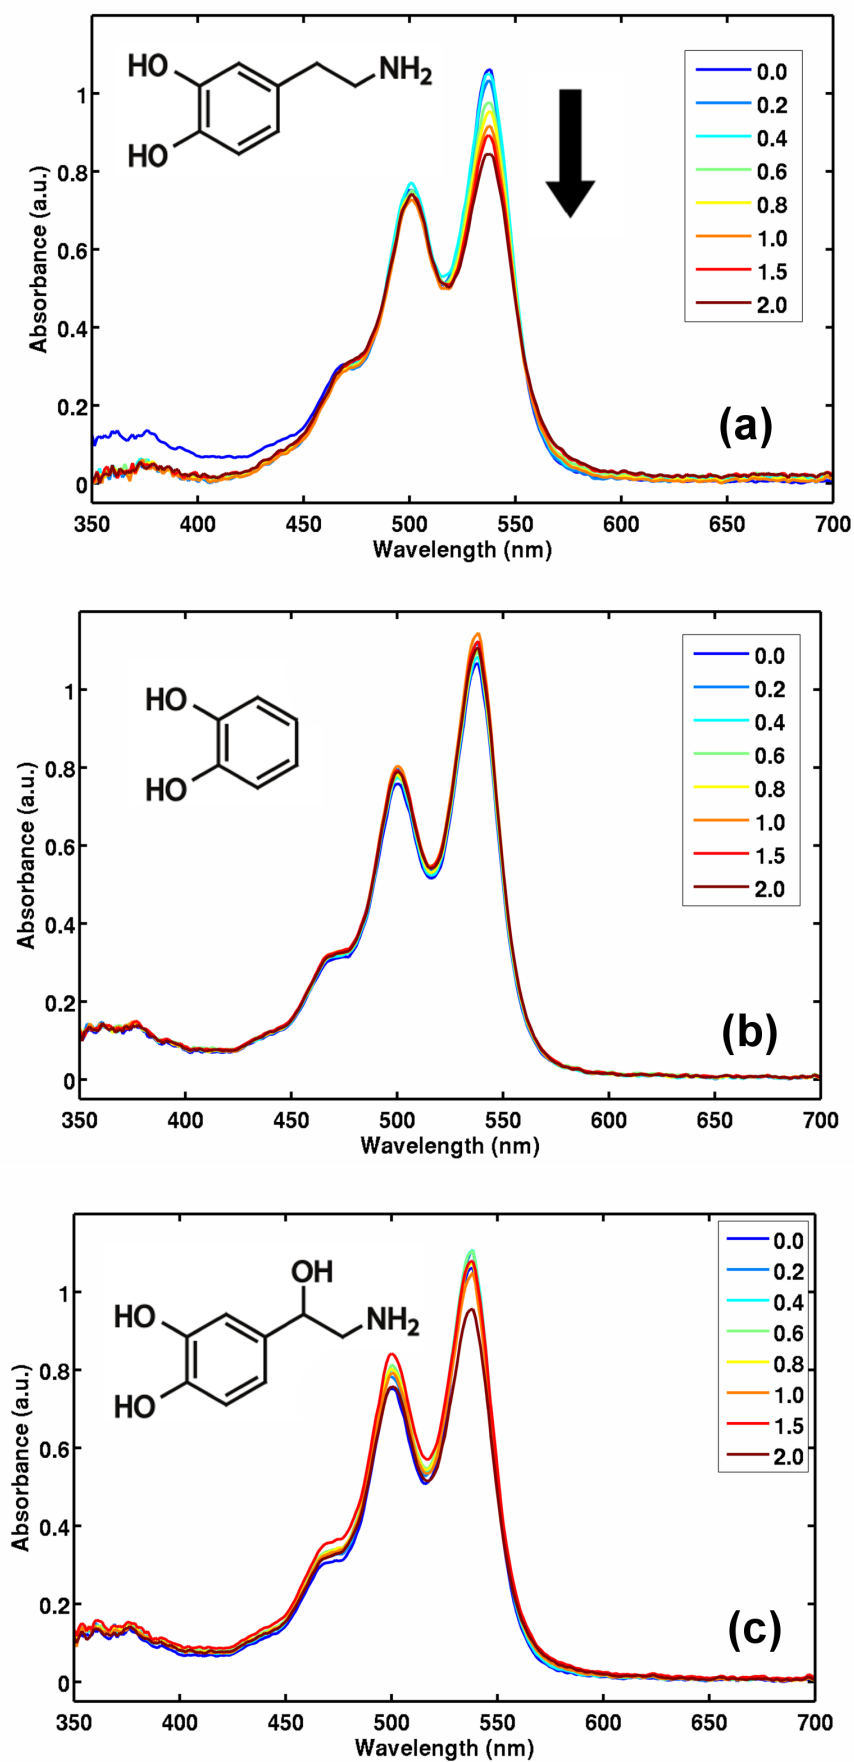

**Figure S4:** Titration of (a) DA, (b) Cat and (c) NE into 1:1 PDI-CB[8] ( $3 \times 10^{-5}$  M) solution also containing ascorbic acid ( $3 \times 10^{-5}$  M). The presence of ascorbic acid does not affect binding behaviour of the three compounds.

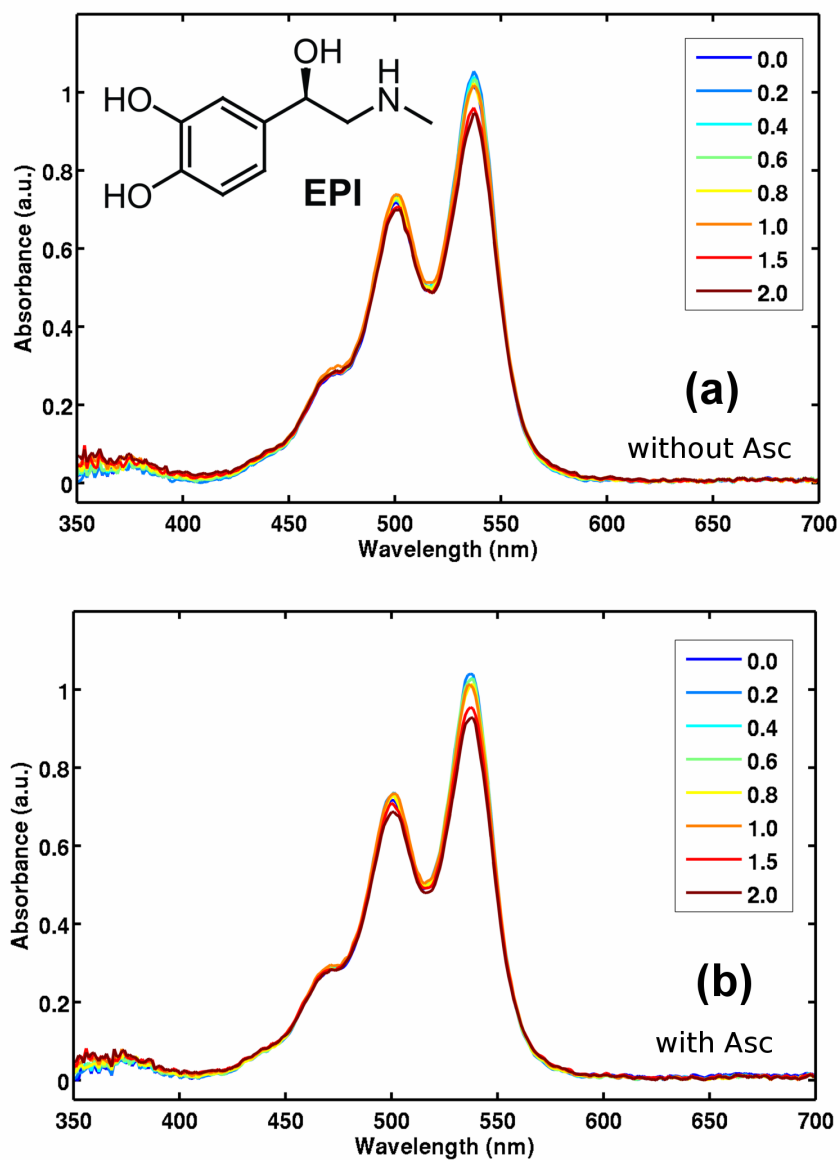

**Figure S5:** Titration of EPI into 1:1 PDI-CB[8] ( $3 \times 10^{-5}$  M) (a) without ascorbic acid present and (b) with ascorbic acid ( $3 \times 10^{-5}$  M) present in the solution. The presence of ascorbic acid does not affect binding behaviour of EPI.

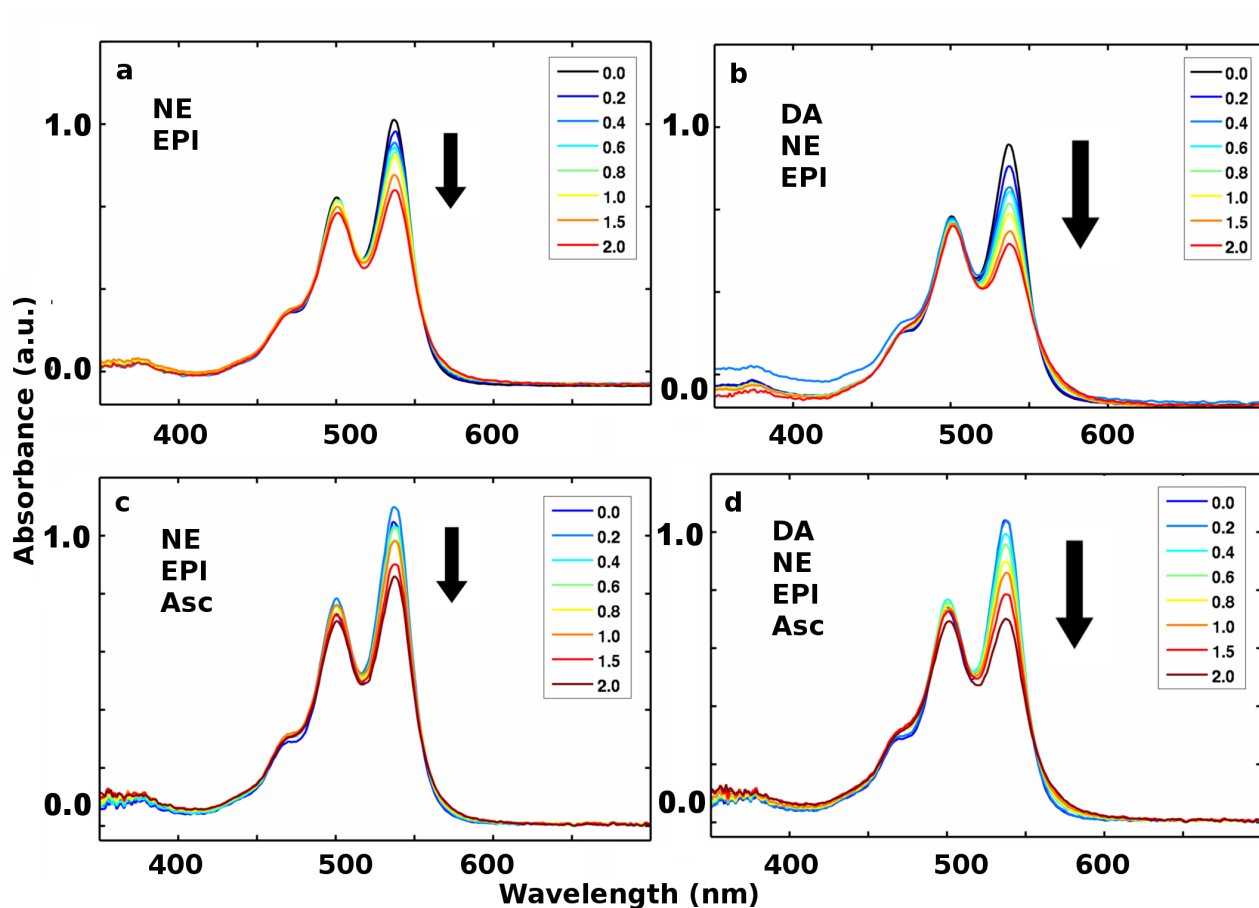

**Figure S6:** Titration of (a) Mixture 1 (EPI + NE), (b) Mixture 2 (EPI + NE + DA), (c) Mixture 1 (EPI + NE) with Asc and (d) Mixture 2 (EPI + NE + DA) into 1:1 PDI-CB[8] ( $3 \times 10^{-5}$  M) solution. The presence of ascorbic acid does not show interference within the mixtures.
